# Supplementary material for: IL-6 regulates CCR5 expression and immunosuppressive capacity of MDSC in murine melanoma
Source: PubMed Central journal article supplement — J Immunother Cancer. 2020 Aug 11;8(2):e000949. doi: 10.1136/jitc-2020-000949 (PMC7422659; doi:10.1136/jitc-2020-000949), 2020-08-11
Supplement: jitc-2020-000949supp001.pdf [file jitc-2020-000949supp001.pdf]

Weber *et al.* — MDSC Regulation by IL-6 in Melanoma**Table S1** Final concentrations of agents added to the myeloid cell cultures.

| Agents           | Final concentration |
|------------------|---------------------|
| CCL3, CCL4, CCL5 | 20 ng/ml            |
| GM-CSF           | 40 ng/ml            |
| IFN- $\gamma$    | 10 ng/ml            |
| IL-1 $\beta$     | 40 ng/ml            |
| IL-6             | 40 ng/ml            |
| LPS              | 5 $\mu$ g/ml        |
| Pam3CSK4         | 1 $\mu$ g/ml        |
| R848             | 1 $\mu$ g/ml        |
| tumor-derived EV | 10 $\mu$ g/ml       |

**Table S2** Primers used for qRT-PCR.

| Mouse gene    | Forward primer (5' - 3')  | Reverse primer (5' - 3')  |
|---------------|---------------------------|---------------------------|
| <i>Arg1</i>   | GCTGTCTTCCCAAGAGTTGGG     | ATGGAAGAGACCTTCAGCTAC     |
| <i>Cox2</i>   | TCTGGAACATTGTGAACAACATC   | AAGCTCCTTATTTCCCTTCACAC   |
| <i>Ido1</i>   | AGGATCCTTGAAGACCACCA      | CCAATAGAGAGACGAGGAAG      |
| <i>Il10</i>   | ATAACTGCACCCACTTCCCA      | GGGCATCACTTCTACCAGGT      |
| <i>Il6</i>    | TTCCATCCAGTTGCCTTCTTG     | GAAGGCCGTGGTTGTCACC       |
| <i>Nos2</i>   | TTGGGTCTTGTTAGCCTAGTC     | TGTGCAGTCCCAGTGAGGAAC     |
| <i>Pdl1</i>   | TGGACAAACAGTGACCACCAA     | CCCCTCTGTCCGGGAAGT        |
| <i>Rn18s</i>  | CGCGGTTCTATTTTGTGGT       | AGTCGGCATCGTTTATGGTC      |
| <i>S100a8</i> | GGAAATCACCATGCCCTCTACAA   | ATGCCACACCCACTTTTATCACC   |
| <i>S100a9</i> | GGAGCGCAGCATAACCACCATC    | GCCATCAGCATCATACTCCTCA    |
| <i>Tgfb1</i>  | GGATACCAACTATTGCTTCAGCTCC | AGGCTCCAAATATAGGGGCAGGGTC |

Weber *et al.* — MDSC Regulation by IL-6 in Melanoma**Table S3** Antibodies used for flow cytometry.

| Specificity | Conjugate              | Clone     | Manufacturer   | Order no.  |
|-------------|------------------------|-----------|----------------|------------|
| CCR5        | Ax488                  | HM-CCR5   | BioLegend      | 107008     |
| CCR5        | BB515                  | C34-3448  | BD biosciences | 565093     |
| CCR5        | BV605                  | C34-3448  | BD biosciences | 743697     |
| CD11b       | APC-Cy <sup>TM</sup> 7 | M1/70     | BD biosciences | 557657     |
| CD25        | BB515                  | PC61      | BD biosciences | 564458     |
| CD3         | PerCP-Cy5.5            | 145-2C11  | BD biosciences | 551163     |
| CD4         | PE-Cy <sup>TM</sup> 7  | RM4-5     | BD biosciences | 552775     |
| CD45        | V500                   | 30-F11    | BD biosciences | 561487     |
| CD69        | PE                     | H1.2F3    | BD biosciences | 561932     |
| CD8a        | APC-Cy <sup>TM</sup> 7 | 53-6.7    | BD biosciences | 557654     |
| CD8a        | eFluor450              | 53-6.7    | Thermo Fisher  | 48-0081-82 |
| FoxP3       | Ax647                  | MF23      | BD biosciences | 560402     |
| Gr1         | PE-Cy <sup>TM</sup> 7  | RB6-8C5   | BD biosciences | 565033     |
| PD-L1       | BV421                  | MIH5      | BD biosciences | 564716     |
| pSTAT3      | PE                     | 4/P-STAT3 | BD biosciences | 562072     |

**Table S4** Antibodies used for ChIP.

| Antibody               | Manufacturer              | Order no. |
|------------------------|---------------------------|-----------|
| Phospho-Stat3 (Tyr705) | Cell Signaling Technology | 9131      |
| Rabbit IgG             | Cell Signaling Technology | 2729      |

Weber *et al.* — MDSC Regulation by IL-6 in Melanoma**Table S5** Primers used for ChIP qPCR.

| <b>Position on <i>Ccr5</i> promoter relative to TSS</b> | <b>Forward primer (5' - 3')</b> | <b>Reverse primer (5' - 3')</b> |
|---------------------------------------------------------|---------------------------------|---------------------------------|
| minus 1649                                              | CGCAGGCAAATGGATGGAAC            | GGTAGATCTCTTCACTGCTGCT          |
| minus 1159                                              | CTGACACCTCAACTCCCTGC            | GGCTAGCCTGGGATTGTCTG            |
| minus 587                                               | TCCTTCACGGCTCCAGATAA            | CAACTGCTATCAAACAGGTTTACCA       |
| plus 150                                                | CATCCGTTCCCCCTACAAGAG           | GCTGACAGATGTCCTCTCAGGAT         |
