# Supplementary material for: IL-6 regulates CCR5 expression and immunosuppressive capacity of MDSC in murine melanoma
Source: PubMed Central journal article supplement — J Immunother Cancer. 2020 Aug 11;8(2):e000949. doi: 10.1136/jitc-2020-000949 (PMC7422659; doi:10.1136/jitc-2020-000949), 2020-08-11

Weber *et al.* — MDSC Regulation by IL-6 in Melanoma

Fig. S1

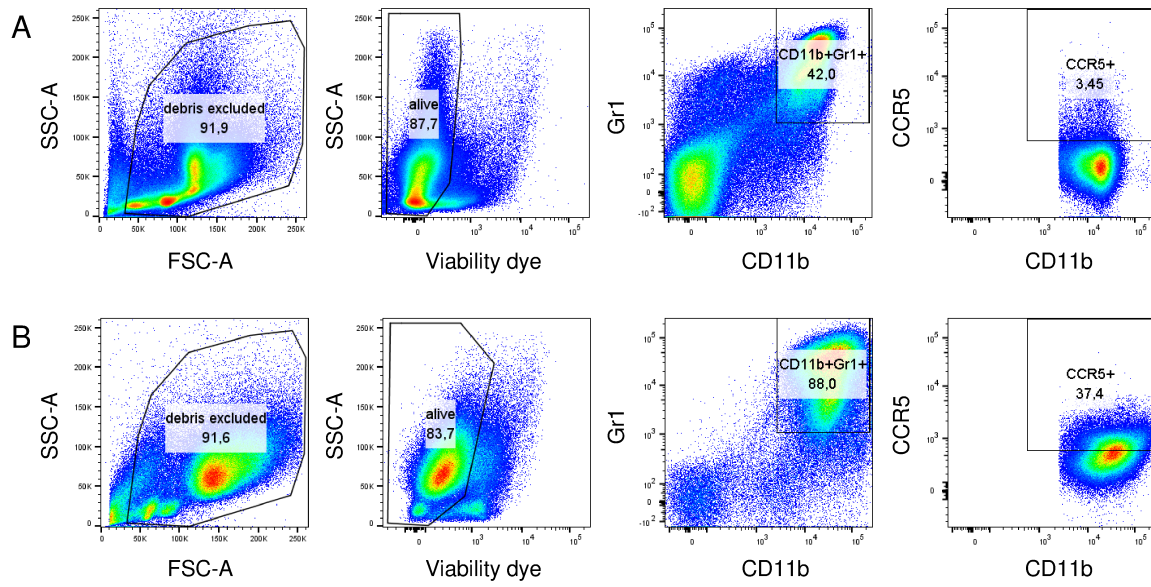

Weber *et al.* — MDSC Regulation by IL-6 in Melanoma

Fig. S2

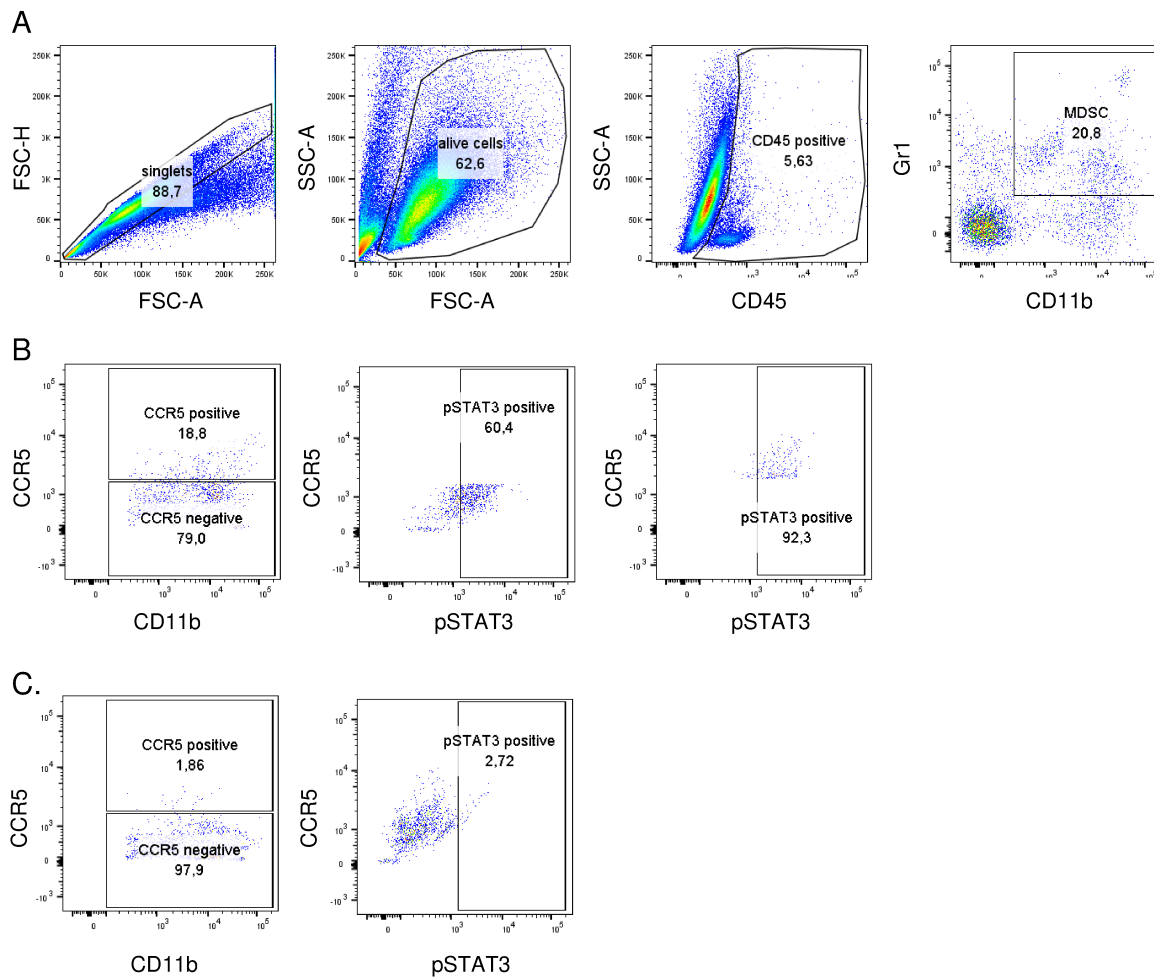

Fig. S3

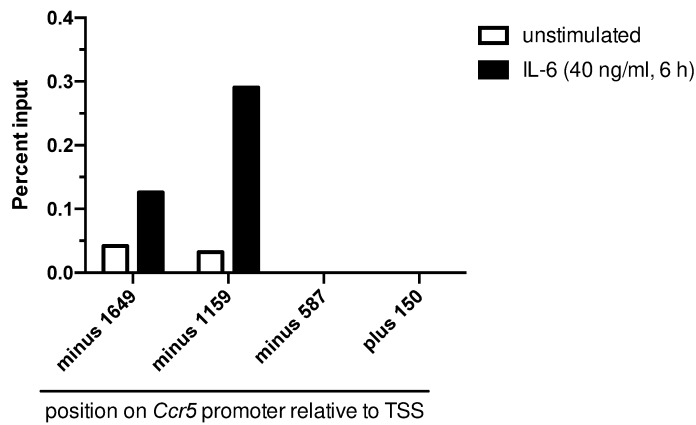

Weber *et al.* — MDSC Regulation by IL-6 in Melanoma

Fig. S4

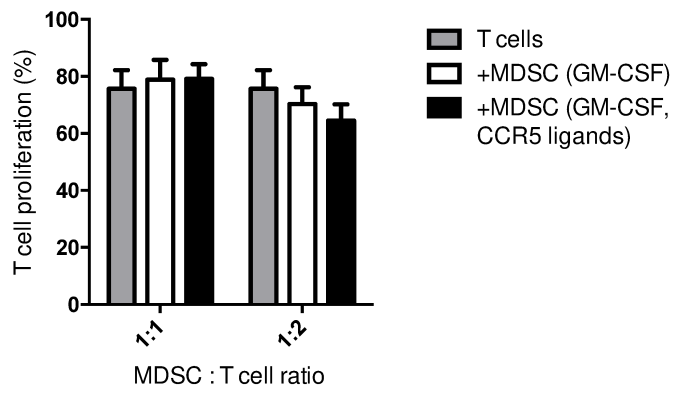

Fig. S5

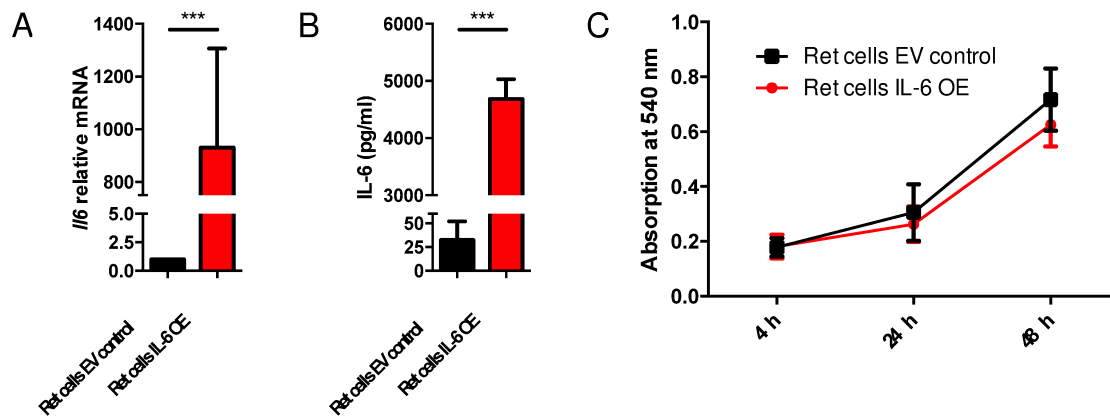

Weber *et al.* — MDSC Regulation by IL-6 in Melanoma

Fig. S6

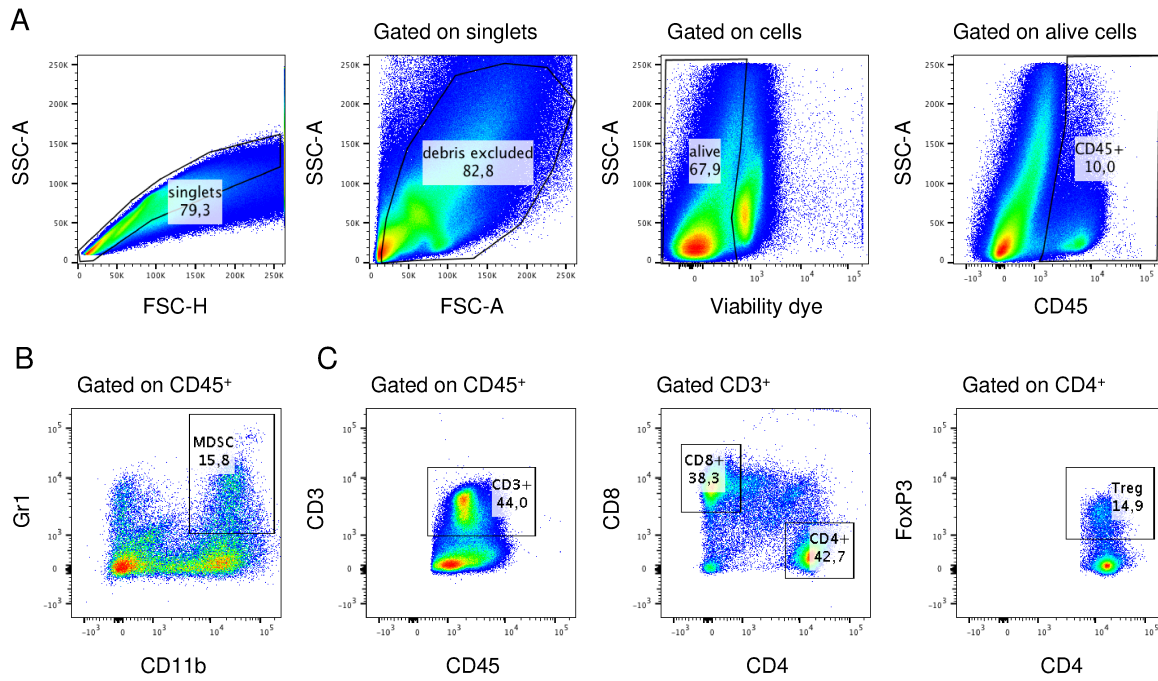

Supplement: jitc-2020-000949supp002.pdf [file jitc-2020-000949supp002.pdf]
